# Supplementary material for: Efficient photocatalytic reactors via 3D printing: SLA fabrication and TiO 2 hybrid materials
Source: Royal Society of Chemistry journal article supplement (doi:10.1039/d4ra07121b), 2025-01-01
Supplement: d4ra07121b1.pdf [file d4ra07121b1.pdf]

## ARTICLE

### Additive Manufacturing of Photocatalytic Reactors

Isabel S.O. Barbosa,<sup>a,c</sup> Yaidelin J.A. Manrique,<sup>a,c</sup> Diana Paiva,<sup>b,c</sup> Joaquim L. Faria,<sup>a,c</sup> Ricardo J. Santos,<sup>a,c</sup> and Cláudia G. Silva <sup>\*a,c</sup>

Received 00th January 20xx,  
Accepted 00th January 20xx

DOI: 10.1039/x0xx00000x

Supplementary Information.

#### A Physical and Chemical Properties of TiO<sub>2</sub> Aeroxide® P25 (Evonix)

Table 1 shows the characteristic physical and chemical data.

Table 1 Physical and Chemical Properties of TiO<sub>2</sub> Aeroxide® P25 (Evonix).

|                                                              |                         |
|--------------------------------------------------------------|-------------------------|
| <b>Specific surface area (BET)</b>                           | 35-65 m <sup>2</sup> /g |
| <b>pH value</b> in 4% dispersion                             | 3.5-4.5                 |
| <b>Loss on drying (2h at 105 °C)</b>                         | ≤1.5 %                  |
| <b>Tamped density</b>                                        | 100-180 g/l             |
| <b>Titanium Dioxide</b> based on ignited material            | ≥99.50%                 |
| <b>Al<sub>2</sub>O<sub>3</sub></b> based on ignited material | ≤0.300%                 |
| <b>SiO<sub>2</sub></b> based on ignited material             | ≤0.200%                 |
| <b>Fe<sub>2</sub>O<sub>3</sub></b> based on ignited material | ≤0.010%                 |
| <b>HCl</b> based on ignited material                         | ≤0.300%                 |
| <b>Sieve residue (by Mocker, 45µm)</b>                       | ≤0.050%                 |

## B Conditions of Rheological Tests

In rotational tests, all the resins were tested and classified under the conditions set in Table G.2.

Table 2 Experimental Conditions used in CSR and CSS Tests.

| Test                                         | R1                      | R2                      |
|----------------------------------------------|-------------------------|-------------------------|
| Type of curve                                | Viscosity curve (VC)    | Flow curve (FC)         |
| Temperature (°C)                             | 20                      | 20                      |
| Shear Rate $\dot{\gamma}$ (s <sup>-1</sup> ) | 1-100                   | -                       |
| Shear Stress $\tau$ (Pa)                     | -                       | 1-100                   |
| Increasing                                   | linear                  | linear                  |
| Measurement Time                             | 100 points<br>5 s/point | 100 points<br>5 s/point |

Table 3 Step conditions of the Temperature-dependent viscosity (TC) test.

|                                              | <i>Pre-shear</i>       | <i>Ramp Up</i>         | <i>Ramp Down</i>        |
|----------------------------------------------|------------------------|------------------------|-------------------------|
| Temperature (°C)                             | 20                     | 20-40                  | 40-20                   |
| Shear Rate $\dot{\gamma}$ (s <sup>-1</sup> ) | 100                    | 100                    | 100                     |
| Increasing                                   | -                      | Linear                 | -                       |
| Measurement Time                             | 1 point<br>3 min/point | 100 points<br>5s/point | 3 points<br>2 min/point |
